# Supplementary material for: ILs-based microwave-assisted extraction coupled with aqueous two-phase for the extraction of useful compounds from Chinese medicine
Source: Royal Society of Chemistry journal article supplement (doi:10.1039/c2an35476d), 2012-01-01
Supplement: c2an35476d.pdf [file c2an35476d.pdf]

## Supplementary Data

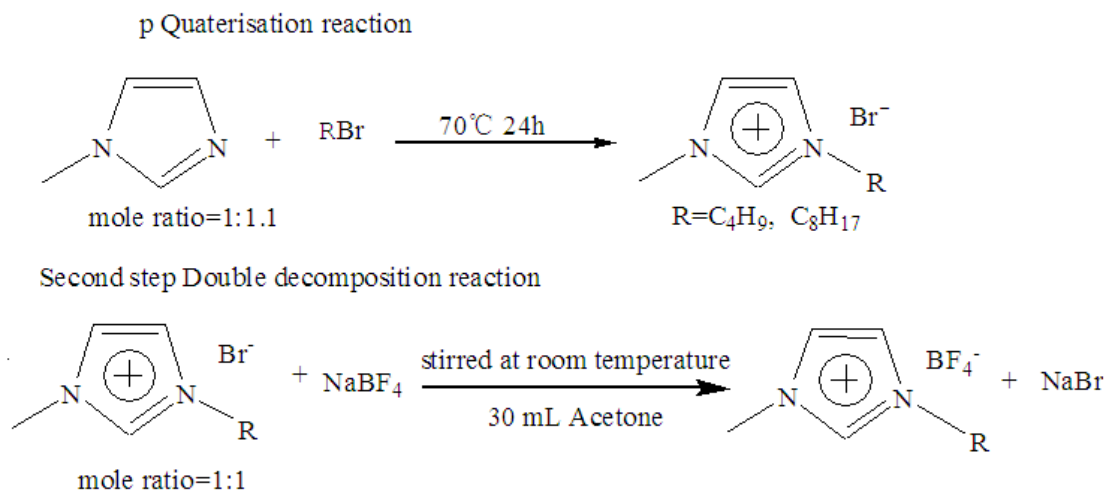

Fig. S1 Synthetic route

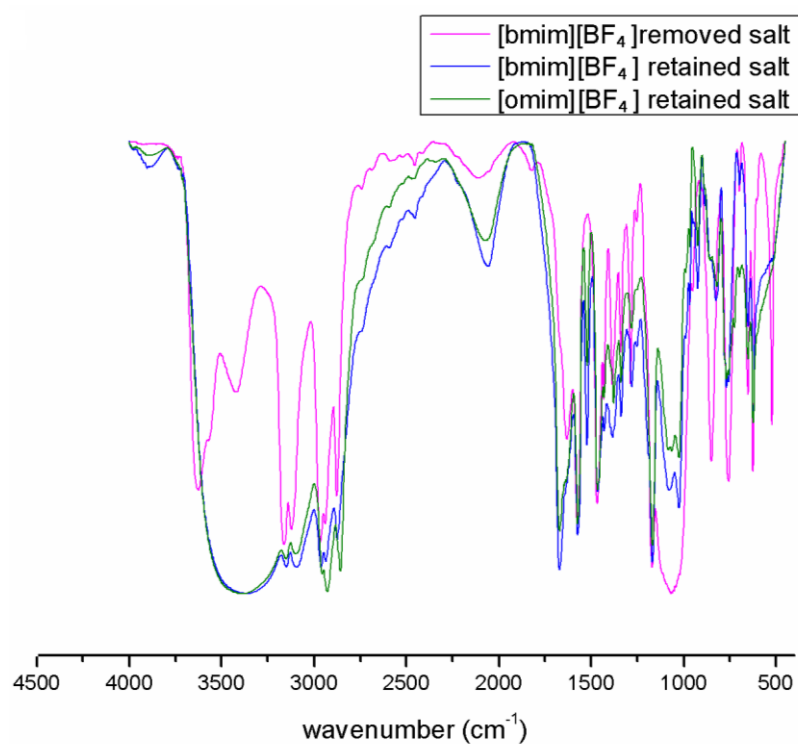

Fig. S2 Infrared spectroscopy of ILs

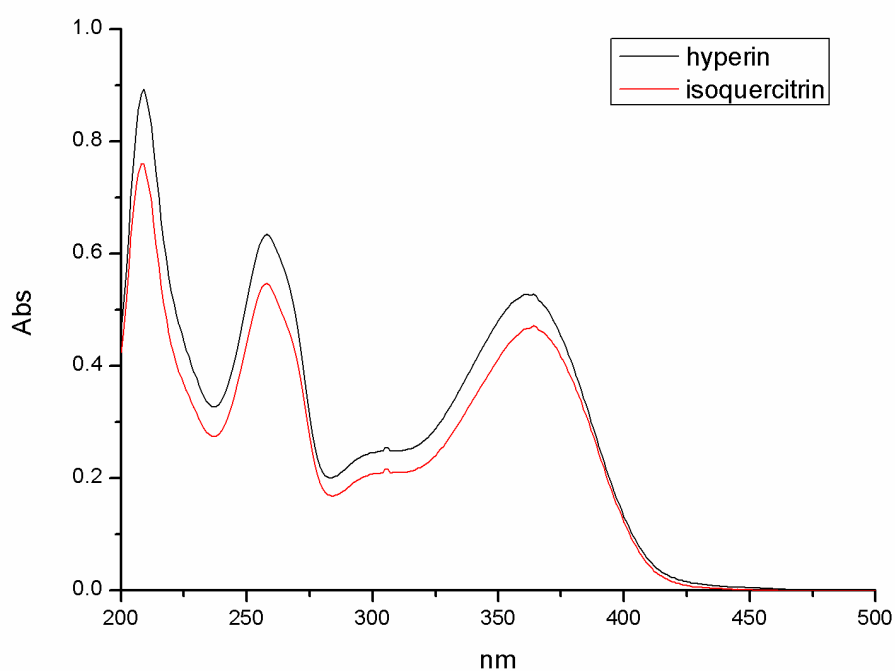

Fig. S3 Absorbance spectra of 0.08 mg/mL hyperin and 0.06 mg/mL isoquercitrin  
(methanol as blank)

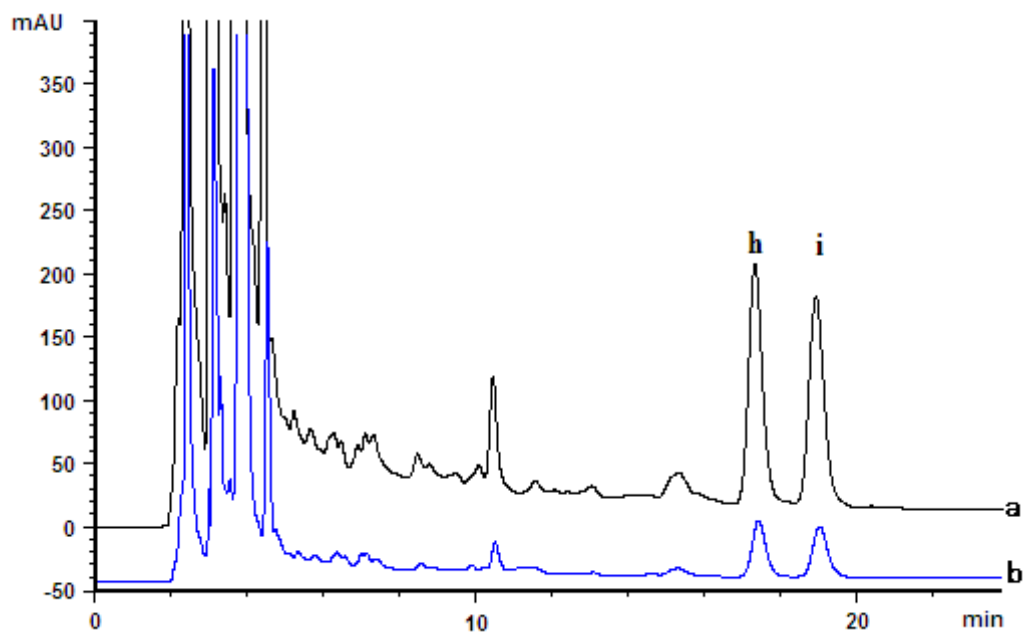

Fig.S4 Chromatogram of the extract of Apocynum: a solution before pre-concentration;  
b solution after pre-concentration. Peak h: hyperin; i: isoquercitrin.

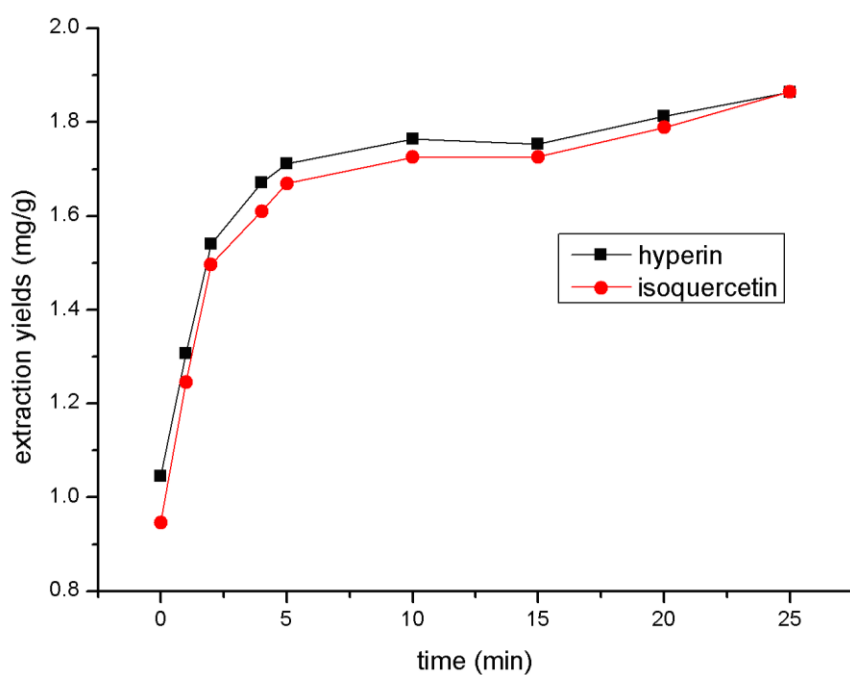

Fig. S5 Kinetic curves of hyperin and isoquercitrin extracted from Apocynum.

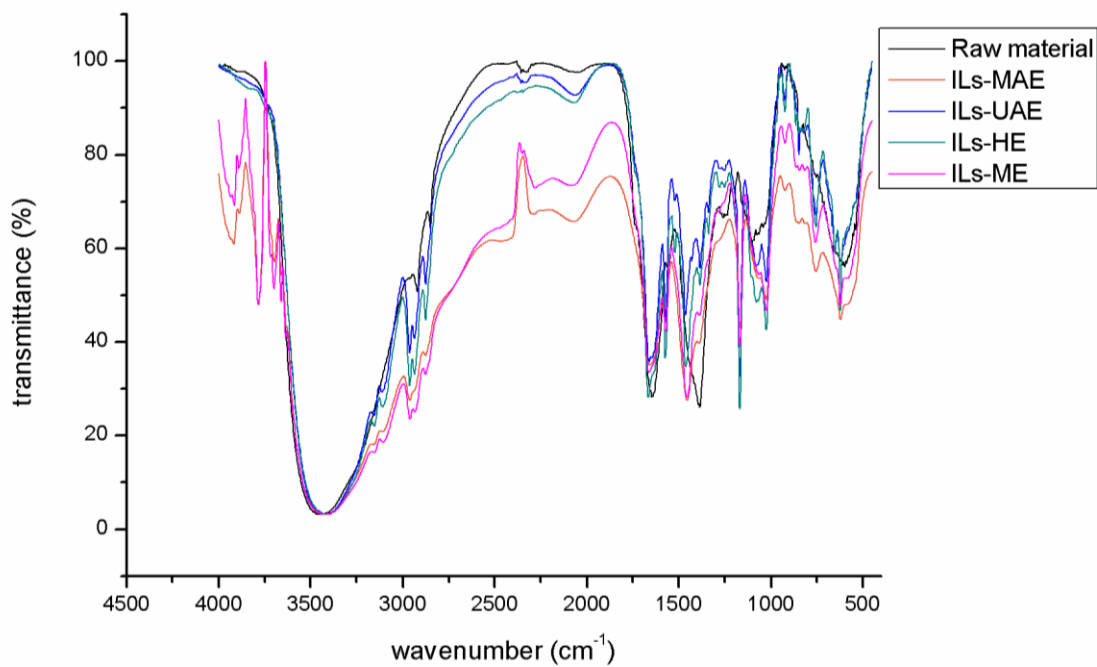

Fig. S6 FT-IR spectra of Apocynum before and after different extraction techniques.

**Table S**

**(A)  $^1\text{H}$ -NMR spectra of the investigated ILs (seen in Fig. S1)**

| $^1\text{H}$ NMR ( $\delta$ , $\times 10^{-6}$ ) <sup>a</sup> | ILs                                                      |                                                          |                                                          |
|---------------------------------------------------------------|----------------------------------------------------------|----------------------------------------------------------|----------------------------------------------------------|
|                                                               | removed salt                                             | contained salt                                           | contained salt                                           |
|                                                               | [bmim][BF <sub>4</sub> ] <sup>b</sup> (D <sub>2</sub> O) | [bmim][BF <sub>4</sub> ] <sup>b</sup> (D <sub>2</sub> O) | [omim][BF <sub>4</sub> ] <sup>b</sup> (D <sub>2</sub> O) |
| 2-H                                                           | 8.63 (1H, s)                                             | 8.65 (1H, s)                                             | 8.69 (1H, s)                                             |
| 4-H                                                           | 7.36 (1H, s)                                             | 7.35 (1H, s)                                             | 7.39 (1H, s)                                             |
| 5-H                                                           | 7.41 (1H, s)                                             | 7.41 (1H, s)                                             | 7.44 (1H, s)                                             |
| 6-H                                                           | 3.83 (1H, s)                                             | 3.82 (1H, s)                                             | 3.85 (1H, s)                                             |
| 7-H                                                           | 4.13 (1H, s)                                             | 4.12 (1H, s)                                             | 4.14 (1H, s)                                             |
| 8-H                                                           | 1.79 (1H, s)                                             | 1.78 (1H, s)                                             | 1.81 (1H, s)                                             |
| 9-H                                                           | 1.25 (1H, s)                                             | 1.23 (1H, s)                                             | 1.28 (1H, s)                                             |
| 10-H                                                          | 0.86 (1H, s)                                             | 0.85 (1H, s)                                             | 1.28 (1H, s)                                             |
| 11-H                                                          |                                                          |                                                          | 1.28 (1H, s)                                             |
| 12-H                                                          |                                                          |                                                          | 1.28 (1H, s)                                             |
| 13-H                                                          |                                                          |                                                          | 1.19 (1H, s)                                             |
| 14-H                                                          |                                                          |                                                          | 0.79 (1H, s)                                             |

<sup>a</sup> Note:  $^1\text{H}$ -NMR chemical shifts are reported downfield from trimethylsilane (TMS). Multiplicities

are abbreviated as s=singlet, d=doublet, quart =quartet, t=triplet and m= multiplet.

<sup>b</sup> The four ILs were recorded on Varian-INOVA 400 NMR spectrometry.

**(B)  $^{13}\text{C}$ -NMR spectra of the investigated ILs (seen in Fig. S1)**

| $^{13}\text{C}$ NMR ( $\delta$ , $\times 10^{-6}$ ) <sup>a</sup> | ILs                                                      |                                                          |                                                          |
|------------------------------------------------------------------|----------------------------------------------------------|----------------------------------------------------------|----------------------------------------------------------|
|                                                                  | removed salt                                             | contained salt                                           | contained salt                                           |
|                                                                  | [bmim][BF <sub>4</sub> ] <sup>b</sup> (D <sub>2</sub> O) | [bmim][BF <sub>4</sub> ] <sup>b</sup> (D <sub>2</sub> O) | [omim][BF <sub>4</sub> ] <sup>b</sup> (D <sub>2</sub> O) |
| 2-H                                                              | 128.95                                                   | 128.95                                                   | 128.94                                                   |
| 4-H                                                              | 115.27                                                   | 115.27                                                   | 115.31                                                   |
| 5-H                                                              | 116.53                                                   | 116.53                                                   | 116.59                                                   |
| 6-H                                                              | 28.629                                                   | 28.697                                                   | 28.75                                                    |
| 7-H                                                              | 42.36                                                    | 42.39                                                    | 42.71                                                    |
| 8-H                                                              | 24.39                                                    | 24.36                                                    | 22.358                                                   |
| 9-H                                                              | 11.853                                                   | 11.868                                                   | 18.47                                                    |
| 10-H                                                             | 5.71                                                     | 5.743                                                    | 21.39                                                    |
| 11-H                                                             |                                                          |                                                          | 21.19                                                    |
| 12-H                                                             |                                                          |                                                          | 24.17                                                    |
| 13-H                                                             |                                                          |                                                          | 15.17                                                    |
| 14-H                                                             |                                                          |                                                          | 6.58                                                     |

<sup>a</sup> Note:  $^{13}\text{C}$ -NMR chemical shifts are reported downfield from trimethylsilane (TMS).

<sup>b</sup> The four ILs were recorded on Varian-INOVA 400 NMR spectrometry.
